# Supplementary material for: Synthesis of jet fuel range paraffins from cellulose
Source: Royal Society of Chemistry journal article supplement (doi:10.1039/d4se00712c), 2024-01-01
Supplement: d4se00712c1.pdf [file d4se00712c1.pdf]

## Preparation of catalysts

The Pd/C, Ru/C, Rh/C and Pt/C catalysts with a metal loading of 5wt.% were prepared by the incipient wetness impregnation of activated carbon with aqueous solutions of PdCl<sub>2</sub>, RuCl<sub>3</sub>, RhCl<sub>3</sub> and H<sub>2</sub>PtCl<sub>6</sub>. After being kept at room temperature for 12 h, the catalysts were dried at 393 K for 12 h and reduced at 623 K for 2 h in a 5% H<sub>2</sub>/Ar flow. After cooling to room temperature, the catalysts were passivated by 1% O<sub>2</sub>/Ar flow for 6 h.

The hydroxyapatite (HAP) loaded metal catalysts (denoted as M/HAP, M = Ni, Ru, Pd, Pt) used in the hydrodeoxygenation (HDO) process were prepared by deposition-precipitation (DP) method. Taking Ni/HAP for example, 2.0 g HAP was vigorously stirred in 30 mL aqueous solution of Ni(NO<sub>3</sub>)<sub>2</sub> for 0.5 h at room temperature. Subsequently, the pH of resultant slurry was slowly adjusted to about 8.0 with NH<sub>3</sub>·H<sub>2</sub>O solution. The mixture was stirred for another 2 h. Finally, the solid was separated by filtration and thoroughly washed with deionized water (to remove the NO<sub>3</sub><sup>-</sup>). The resultant solid material was dried at 393 K for 12 h and reduced in a 20% H<sub>2</sub>/Ar flow at 573 K for 3 h. After being cooled down to room temperature in hydrogen flow, the Ni/HAP catalyst was passivated by 1% O<sub>2</sub>/Ar for 6 h. Analogously, the Ru/HAP, Pd/HAP and Pt/HAP catalysts were prepared by the method, using RuCl<sub>3</sub>, PdCl<sub>2</sub> and H<sub>2</sub>PtCl<sub>6</sub> as the precursors. To facilitate the comparison, the theoretical metal contents in the investigated HDO catalysts were fixed at 2wt.%.

## Characterization of catalysts

The specific Brunauer–Emmett–Teller (BET) surface areas ( $S_{\text{BET}}$ ) of the catalysts were measured by N<sub>2</sub>-physisorption that was carried out at 77 K with an ASAP 2010 apparatus. Before each measurement, the acidic resin was evacuated at 373 K for 6 h.

The amounts of acid sites on the surfaces of acidic resins were measured with a Micromeritics AutoChem II 2920 Automated Catalyst Characterization System by NH<sub>3</sub>-chemisorption. To do this, the catalyst was put into the quartz tube, pretreated with He flow at 393 K for 30 min. After the baseline was stable, NH<sub>3</sub> was injected in a pulse mode until the saturation. The amounts of acid sites on the surfaces of acidic resins were calculated based on the consumption of NH<sub>3</sub>.

### **General experimental details for NMR and GC-MS analysis**

$^1\text{H}$  NMR and  $^{13}\text{C}$  NMR spectra of the products from the HAA reaction of MFA and 2-MF were recorded at room temperature in  $\text{CDCl}_3$  on Bruker AVANCE III 400 MHz instrument. The chemical shifts for  $^1\text{H}$  NMR were recorded in ppm downfield using the peak of  $\text{CDCl}_3$  (7.26 ppm) as the internal standard. The chemical shifts for  $^{13}\text{C}$  NMR were recorded in ppm downfield using the central peak of  $\text{CDCl}_3$  (77.16 ppm) as the internal standard.

GC-MS analysis of the products was carried out by a Varian Corp 450GC/320MS which was equipped with a HP-5 capillary column.

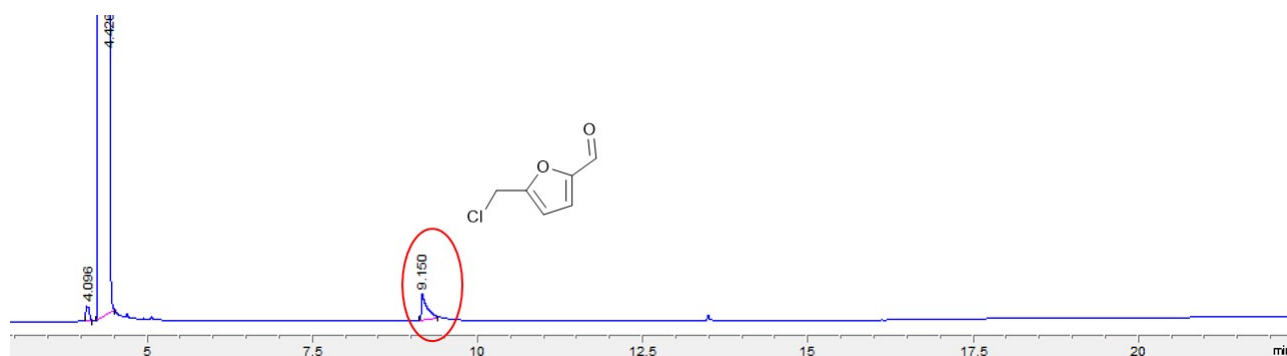

**Figure S1.** Gas chromatogram of the product obtained from the conversion of cellulose in the first-stage. Reaction conditions: 473 K, 1 MPa N<sub>2</sub>, 400 rpm, 6 h; 1.5 g cellulose, 3 g NaCl, 10 mL H<sub>2</sub>O, 20 mL organic solvent were used in the test.

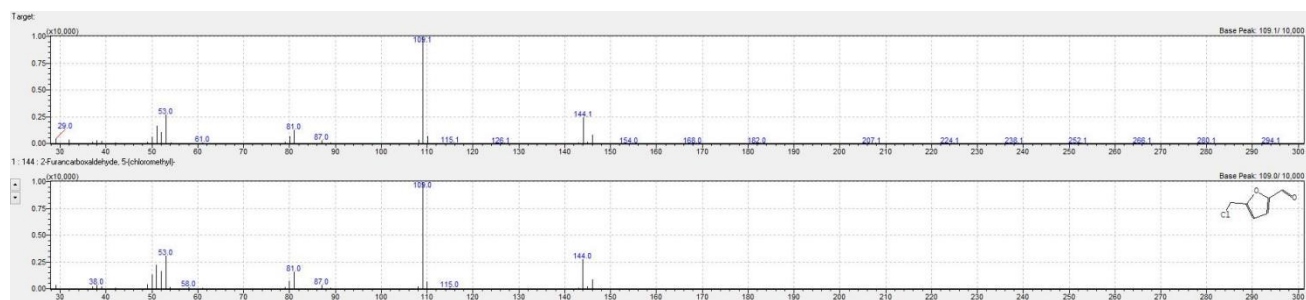

**Figure S2.** Mass spectrogram of the chloromethylfurfural obtained from the conversion of cellulose in the first-stage.

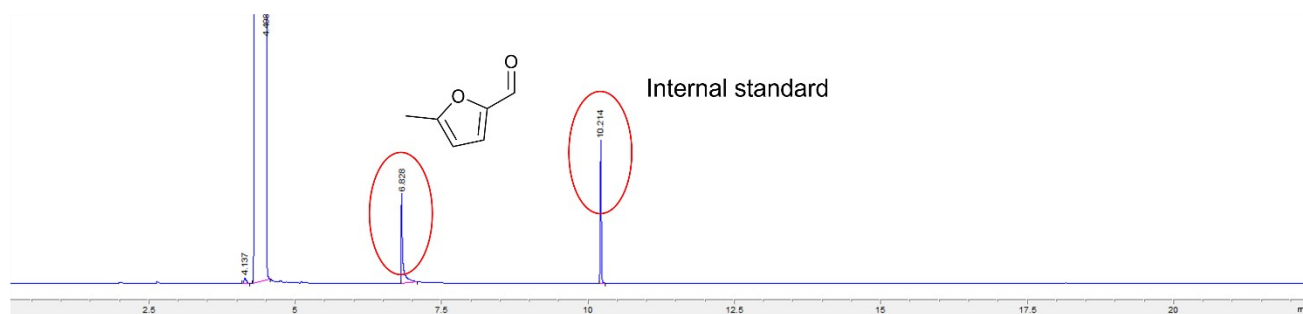

**Figure S3.** Gas chromatogram of the product obtained from the conversion of cellulose by the two-stage process. Reaction conditions: First stage: 473 K, 1 MPa N<sub>2</sub>, 400 rpm, 6 h; 0.3 g cellulose, 3 g NaCl, 10 mL H<sub>2</sub>O, 20 mL organic solvent were used in each test. Second stage: 303 K, 2 MPa H<sub>2</sub>, 400 rpm, 2 h; the organic phase product from the first stage and 0.03 g Pd/C were used in each test.



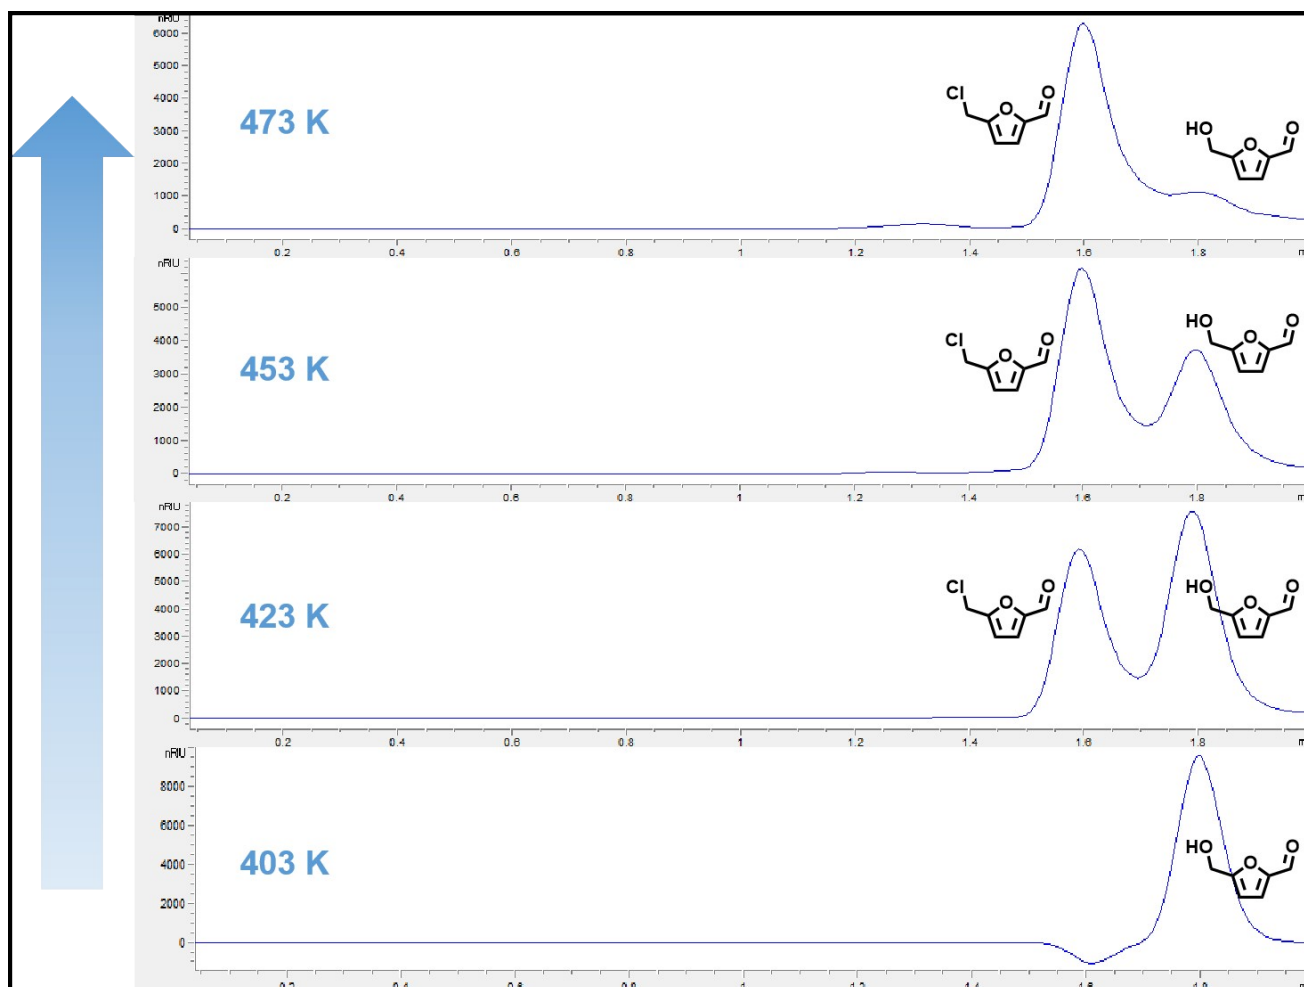

**Figure S5.** HPLC chromatograms of the products obtained from the conversion of cellulose at different reaction temperatures. Reaction conditions: 1 MPa N<sub>2</sub>, 400 rpm, 6 h; 0.3 g cellulose, 3 g NaCl, 10 mL H<sub>2</sub>O, 20 mL organic solvent were used in each test.

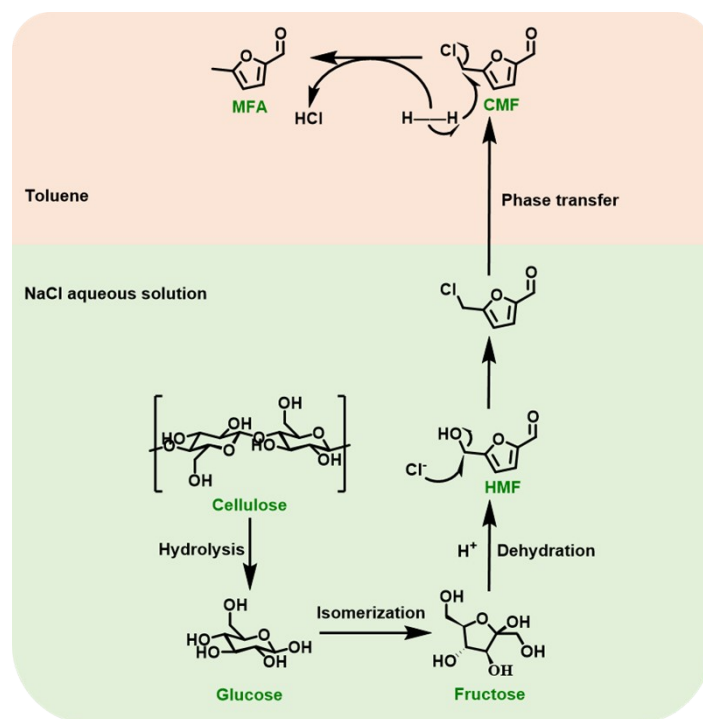

**Figure S6.** Reaction pathway for the synthesis of MFA from cellulose.

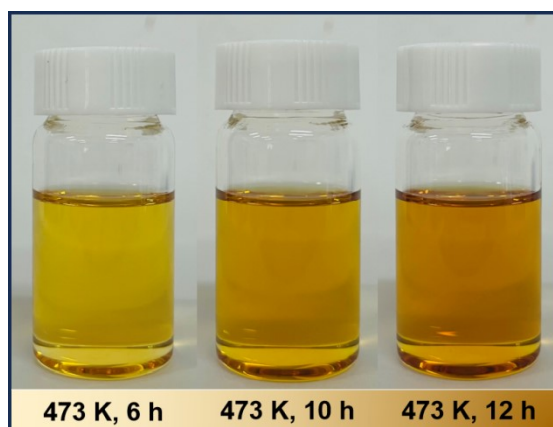

**Figure S7.** Photo of the products obtained from the conversion of cellulose at different reaction times. Reaction conditions: 473 K, 1 MPa N<sub>2</sub>, 400 rpm; 0.3 g cellulose, 3 g NaCl, 10 mL H<sub>2</sub>O, 20 mL organic solvent were used in each test.

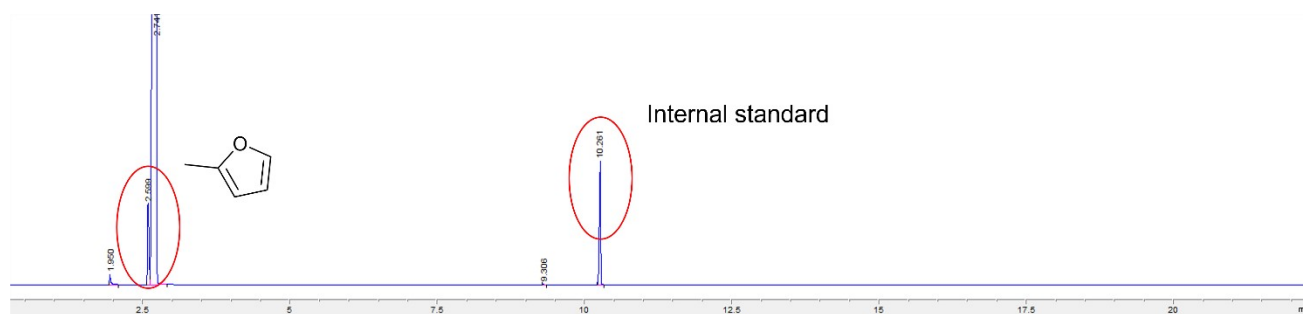

**Figure S8.** Gas chromatogram of the product obtained from decarbonylation of MFA. Reaction conditions: 443 K, 4 h, 400 rpm; 1 mmol MFA, 0.05 g Pd/C and 5 mL ethyl acetate were used in the test.

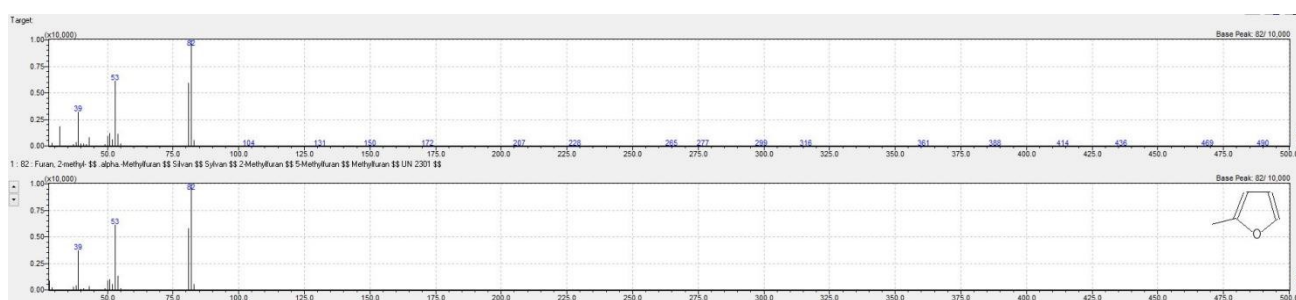

**Figure S9.** Mass spectrogram of the 2-methylfuran (2-MF) obtained from the decarbonylation of MFA.

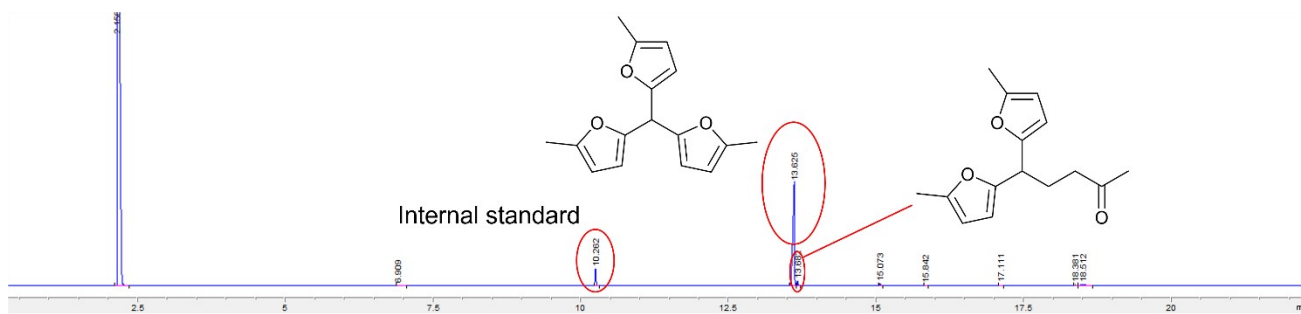

**Figure S10.** Gas chromatogram of the product obtained from HAA of MFA and 2-MF. Reaction conditions: 333 K, 400 rpm, 4 h; 5 mmol MFA, 10 mmol 2-MF and 0.09 g Nafion resin were used for each test.

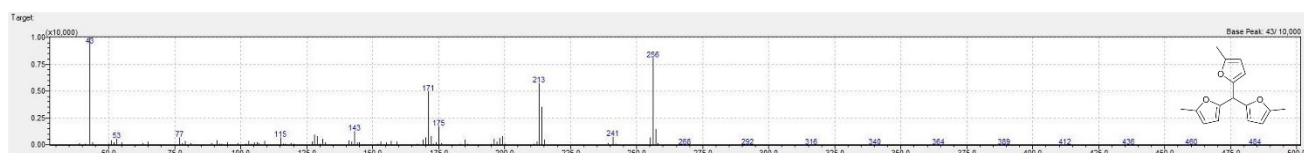

**Figure S11.** Mass spectrogram of the TMFM obtained from the HAA reaction of MFA and 2-MF.

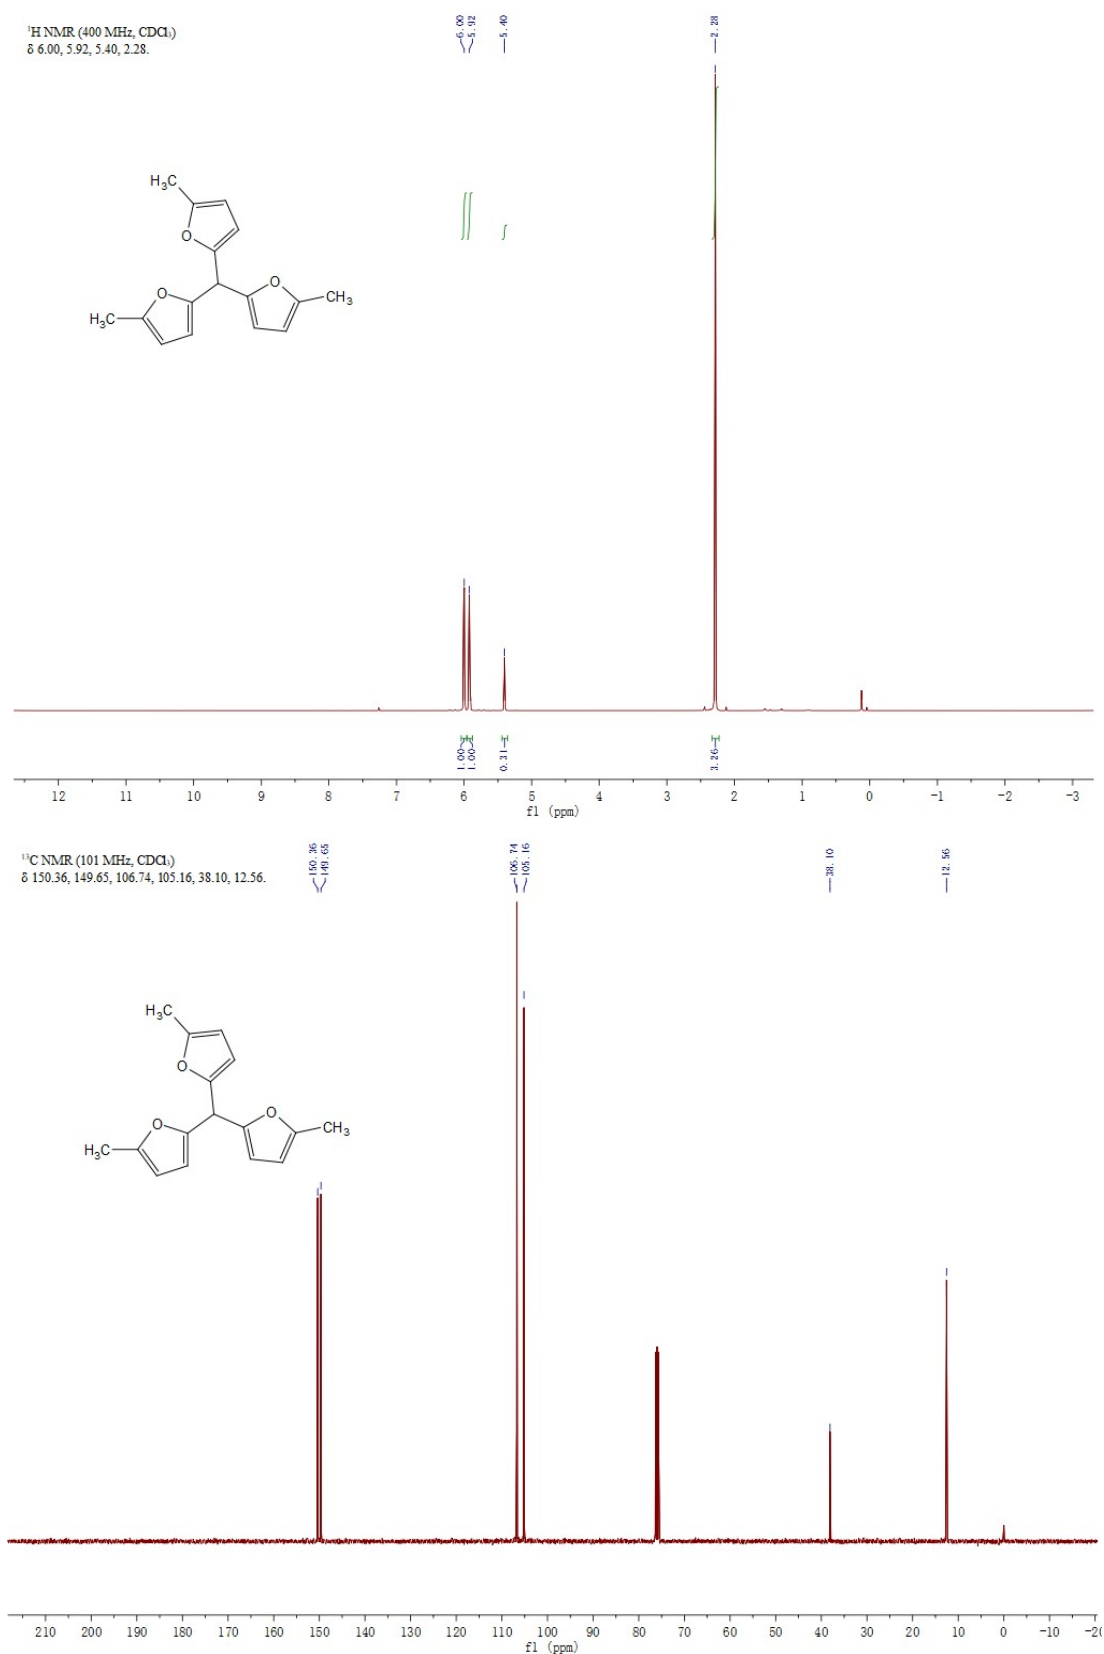

**Figure S12.** <sup>1</sup>H-NMR and <sup>13</sup>C-NMR spectra of the TMFM obtained from the HAA reaction of MFA and 2-MF.

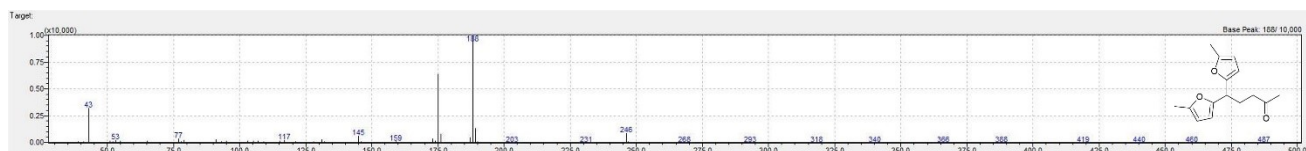

**Figure S13.** Mass spectrogram of the BMFPO generated during the HAA reaction of MFA and 2-MF.

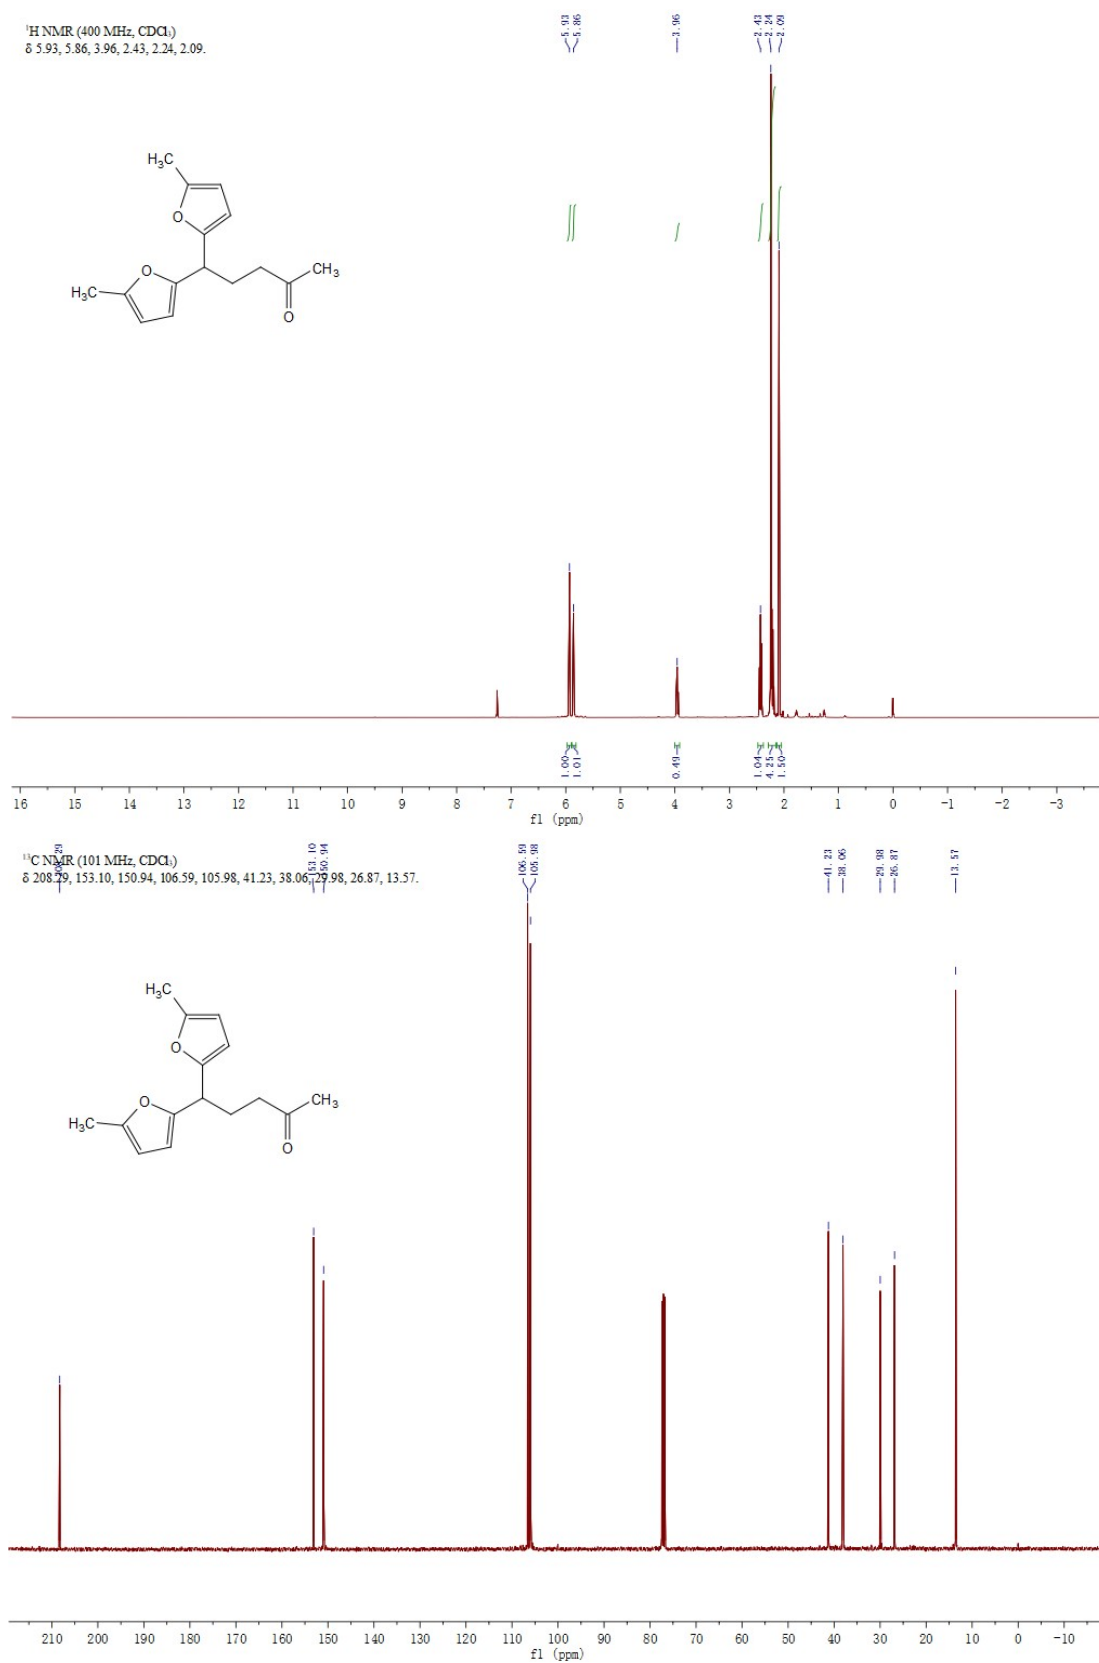

**Figure S14.** <sup>1</sup>H-NMR and <sup>13</sup>C-NMR spectra of the BMFPO generated during the HAA reaction of MFA and 2-MF.

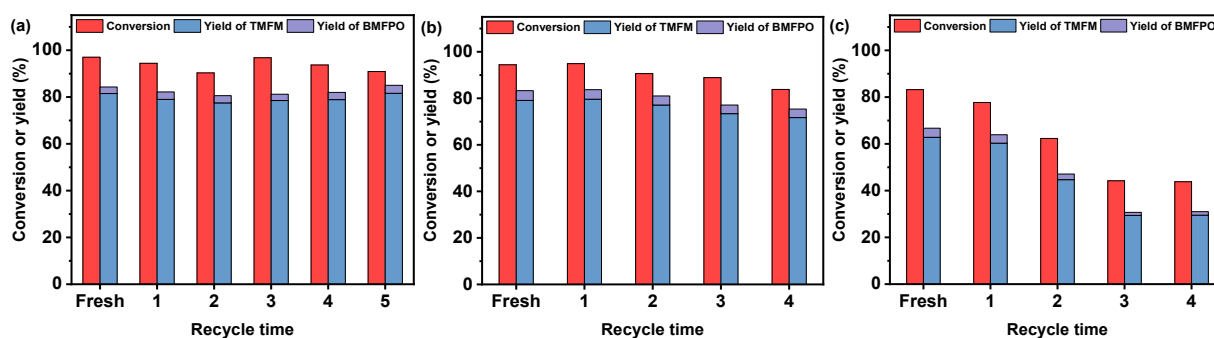

**Figure S15.** Conversion of 2-MF and the yields of TMFM and BMFPO over Nafion (a), Amberlyst-15 (b) and Amberlyst-36 (c) resins as the function of recycle time. Reaction conditions: 333 K, 400 rpm, 2 h; 5 mmol MFA, 10 mmol 2-MF, 0.09 g catalyst were used for each test.

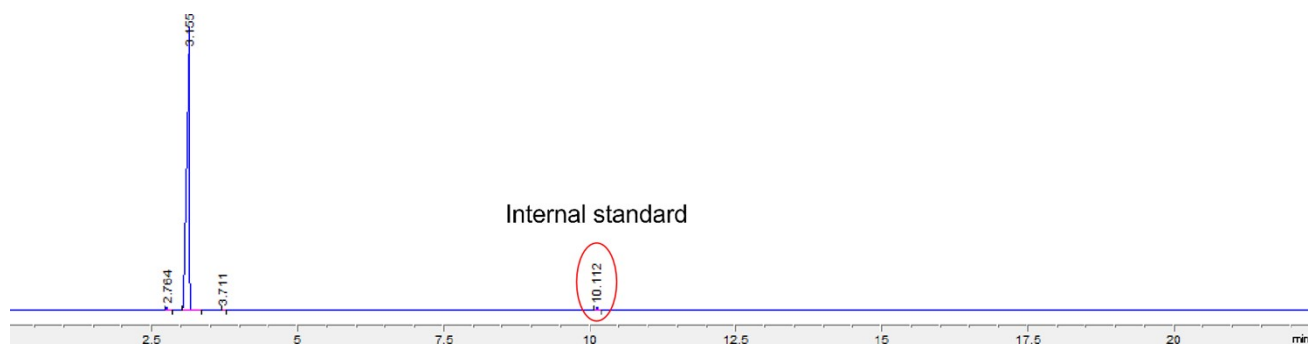

**Figure S16.** Gas chromatogram of blank control experiment for HDO. Reaction conditions: 493 K, 4 MPa  $H_2$ , 500 rpm, 24 h; 30 mL cyclohexane, 0.1 g Ni/HAP and 0.1 g H-ZSM-5 were used for the test.

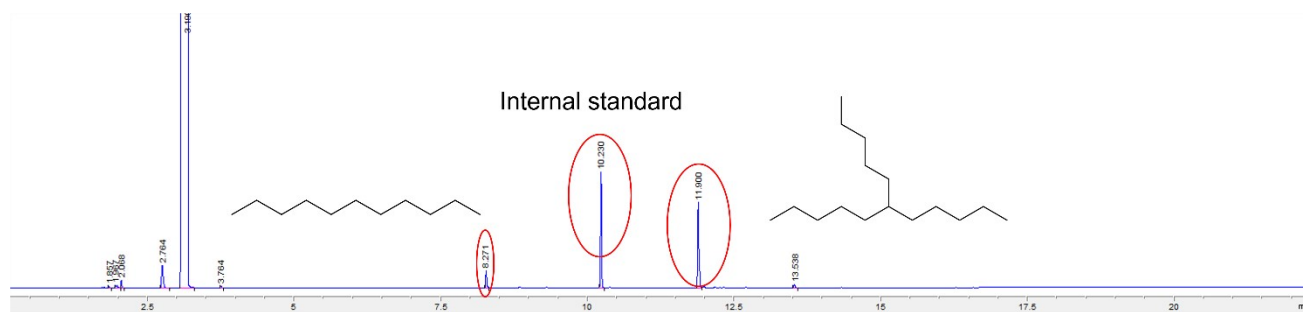

**Figure S17.** Gas chromatogram of the product obtained from HDO of TMFM. Reaction conditions: 453 K, 4 MPa H<sub>2</sub>, 500 rpm, 24 h; 0.1 g TMFM, 30 mL cyclohexane, 0.1 g Ni/HAP and 0.1 g H-ZSM-5 were used for the test.

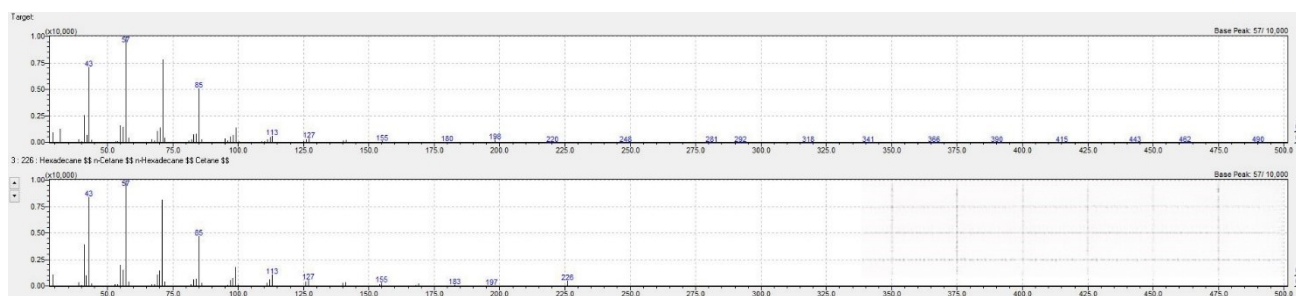

**Figure S18.** Mass spectrogram of the C<sub>16</sub> alkane obtained from HDO of TMFM.

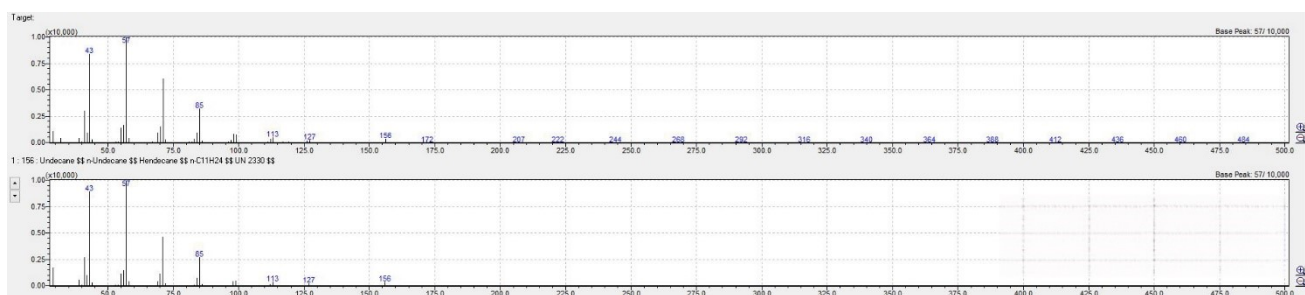

**Figure S19.** Mass spectrogram of the C<sub>11</sub> alkane obtained from HDO of TMFM.

**Table S1.** Comparison of the different routes for the synthesis of jet fuel range alkanes with cellulose.

| Previous works:                     |                                                                                                                                                                                                                                                                                                                                                                                                                                                                 | Main products                                      | Overall yield | Reference |
|-------------------------------------|-----------------------------------------------------------------------------------------------------------------------------------------------------------------------------------------------------------------------------------------------------------------------------------------------------------------------------------------------------------------------------------------------------------------------------------------------------------------|----------------------------------------------------|---------------|-----------|
| Route 1: Cellulose                  | <p>Step 1: Hydrolysis/dehydration<br/><math>\text{H}_2\text{SO}_4</math>, 423 K, 4 h</p> <p>Step 2: Reduction<br/><math>\text{RuRe/C}</math>, 423 K, 0.5 MPa <math>\text{H}_2</math></p> <p>Step 3: Decarbonylation<br/><math>\text{SiO}_2/\text{Al}_2\text{O}_3</math>, 648 K</p> <p>Step 4: Oligomerization<br/>Amberlyst-70, 443 K</p>                                                                                                                       | $\text{C}_8\text{-C}_{20}$ Alkanes                 | 36%           | 1         |
| Route 2: Cellulose                  | <p>Step 1: Hydrolysis/dehydration<br/><math>\text{H}_2\text{SO}_4</math>, 423 K</p> <p>Step 2: Dehydration<br/>K10, 438 K, 6.5 kPa</p> <p>Step 3: Dimerization<br/><math>\text{K}_2\text{CO}_3</math>, 343 K</p> <p>Step 4: Oligomerization<br/><math>\text{Ir-ReO}_2/\text{SiO}_2</math>, 493 K, 5.4 MPa, 7 h</p>                                                                                                                                              | $\text{C}_7\text{-C}_{10}$ Alkanes                 | 47%           | 2,3       |
| Route 3: Cellulose                  | <p>Step 1: Hydrolysis/dehydration<br/>HCl, 473 K, 10 min</p> <p>Step 2: Dehydration<br/><math>\text{H-ZSM-5/SiO}_2</math>, 403 K, 0.01 MPa</p> <p>Step 3: C-C bond formation<br/><math>\text{K}_2\text{CO}_3</math>, 353 K, 3.5 min</p> <p>Step 4: Hydrodeoxygenation<br/><math>\text{Pd/C}</math>, 573 K, 5 MPa <math>\text{H}_2</math></p>                                                                                                                    | $\text{C}_6\text{-C}_{15}$ Alkanes                 | 43%           | 4         |
| Route 4: Cellulose                  | <p>Step 1: Hydrolysis/dehydration<br/><math>\text{H}_2\text{SO}_4</math>, 423 K</p> <p>Step 2: Dehydration<br/>K10, 438 K, 6.5 kPa</p> <p>Step 3: Dimerization<br/><math>\text{K}_2\text{CO}_3</math>, 343 K</p> <p>Step 4: Hydrodecarboxylation<br/><math>\text{PdIr-Al}_2\text{O}_3</math>, 573 K, 1 MPa <math>\text{H}_2</math></p>                                                                                                                          | $\text{C}_6\text{-C}_9$ Alkanes<br>(Minor product) | 35%           | 2,3,5     |
| Route 5: Hemicellulose<br>Cellulose | <p>Step 1: Steam stripping<br/>428 K-438 K</p> <p>Step 2: Hydrolysis/dehydration<br/>458 K-463 K</p> <p>Step 3: Cross condensation<br/><math>\text{NaOH}</math>, 333 K</p> <p>Step 4: Hydrodecarboxylation<br/><math>\text{Ru/Al}_2\text{O}_3</math>, 608-623 K, <math>0.013 \text{ h}^{-1} \text{ H}_2</math></p>                                                                                                                                              | $\text{C}_8\text{-C}_{15}$ Paraffins               | 25%           | 6         |
| Route 6: Cellulose                  | <p>Step 1: Hydrolysis<br/>HCl + <math>\text{Pd/C}</math>, <math>\text{H}_2</math>, 373 K</p> <p>Step 2: Aldol condensation/hydrogenation/hydrodeoxygenation<br/><math>\text{Cu}_2\text{Ni/MgO-p} + \text{NiH-Beta}</math>, <math>\text{H}_2</math>, 473 K</p>                                                                                                                                                                                                   | $\text{C}_{12}$ Alkanes                            | 48%           | 7         |
| This work:                          |                                                                                                                                                                                                                                                                                                                                                                                                                                                                 | Main products                                      | Overall yield |           |
| Route 7: Cellulose                  | <p>Step 1: Cascade hydrolysis/isomerization/chlorination<br/>Toluene/<math>\text{NaCl}</math> aqueous solution</p> <p>Step 2: Hydrodechlorination at room temperature<br/><math>\text{Pd/C}</math>, <math>\text{H}_2</math></p> <p>Step 3: Decarbonylation<br/><math>\text{Pd/C}</math>, 443 K</p> <p>Step 4: Hydroxyalkylation/alkylation (HAA)<br/>Nafion, 333 K</p> <p>Step 5: Hydrodeoxygenation<br/><math>\text{Ni/HAP} + \text{H-ZSM-5}</math>, 493 K</p> | $\text{C}_{11}$ and $\text{C}_{16}$ Alkanes        | 54%           |           |

## References

1. S. Murat Sen, C. A. Henao, D. J. Braden, J. A. Dumesic and C. T. Maravelias, *Chem. Eng. Sci.*, 2012, **67**, 57-67.
2. B. Girisuta, L. P. B. M. Janssen and H. J. Heeres, *Ind. Eng. Chem. Res.*, 2007, **46**, 1696-1708.
3. M. Mascal, S. Dutta and I. Gandarias, *Angew. Chem., Int. Ed.*, 2014, **53**, 1854-1857.
4. J. Xin, S. Zhang, D. Yan, O. Ayodele, X. Lu and J. Wang, *Green Chem.*, 2014, **16**, 3589-3595.
5. F. Chang, S. Dutta and M. Mascal, *ChemCatChem*, 2017, **9**, 2622-2626.
6. Y. Liu, L. Chen, Y. Chen, X. Zhang, J. Liu, Q. Liu, Y. Li, C. Wang, Q. Zhang and L. Ma, *Bioresour. Technol.*, 2023, **372**, 128653.
7. Y. Liu, G. Li, Y. Hu, A. Wang, F. Lu, J.-J. Zou, Y. Cong, N. Li and T. Zhang, *Joule*, 2019, **3**, 1028-1036.
